# Supplementary material
Source: PubMed Central journal article supplement (PMC6980285)

Table S1. Nutrition and Lipid Delivery Protocol

| <b>Protocol Day/Pig Age (in days)<sup>1</sup></b>       | <b>0</b> | <b>1</b> | <b>2</b> | <b>3</b> | <b>4</b> | <b>5</b> | <b>6</b> | <b>7</b> | <b>8</b> |
|---------------------------------------------------------|----------|----------|----------|----------|----------|----------|----------|----------|----------|
| C-section 7-8 days prior to due date                    | ✓        |          |          |          |          |          |          |          |          |
| <b><u>Nutrition</u></b>                                 |          |          |          |          |          |          |          |          |          |
| <b><u>Enteral feedings</u></b> - Litterlife (ml/kg/day) | 100      | 120      | 150      | 180      | 240      | 240      | 240      | 240      | 240      |
| Number of feedings per day                              | 24       | 24       | 24       | 12       | 12       | 12       | 8        | 8        | 8        |
| Interval feeding schedule                               | q1       | q1       | q1       | q2       | q2       | q2       | q3       | q3       | q3       |
| % of energy needs as Enteral                            | 42       | 50       | 63       | 75       | 100      | 100      | 100      | 100      | 100      |
| <b><u>Lipid Supplement Delivery</u></b>                 |          |          |          |          |          |          |          |          |          |
| Lipid supplement                                        |          | ✓        | ✓        | ✓        | ✓        | ✓        | ✓        | ✓        | ✓        |
| Lipid supplement dosing                                 |          | q6       |

q, every (e.g. q1 = every 1 hour)

<sup>1</sup>Day 0 = Date of birth

Table S2. Piglet Cohort Characteristics

| Groups                              | Litter   | n         | Birth Weight, grams, Median (IQR) | Growth Velocity, g/k/d, Median (IQR) | Mortality, n (%) | Mortality Cause                  |
|-------------------------------------|----------|-----------|-----------------------------------|--------------------------------------|------------------|----------------------------------|
| <b>Intralipid</b>                   |          | <b>7</b>  |                                   |                                      | <b>2 (29)</b>    | intestinal perforation, diarrhea |
|                                     | Litter 1 | 2         | 1135 (55)                         | 37.8 (18.9)                          | 0                |                                  |
|                                     | Litter 2 | 3         | 840 (80)                          | 40.3 (5.9)                           | 2                |                                  |
|                                     | Litter 3 | 2         | 1225 (305)                        | 17.7 (13.6)                          | 0                |                                  |
| BW and GV Median (IQR), all litters |          |           | 920 (290)                         | 31.4 (16.7)                          |                  |                                  |
| <b>CLS1</b>                         |          | <b>10</b> |                                   |                                      | <b>1 (10)</b>    | diarrhea                         |
|                                     | Litter 1 | 2         | 1130 (90)                         | 23.4 (1.9)                           | 0                |                                  |
|                                     | Litter 2 | 4         | 840 (40)                          | 38.0 (11.0)                          | 1                |                                  |
|                                     | Litter 3 | 4         | 1135 (201)                        | 18.6 (6.3)                           | 0                |                                  |
| BW and GV Median (IQR), all litters |          |           | 1068 (428)                        | 23.4 (15.1)                          |                  |                                  |
| <b>CLS2</b>                         |          | <b>4</b>  |                                   |                                      | <b>0 (0)</b>     |                                  |
|                                     | Litter 1 |           |                                   |                                      |                  |                                  |
|                                     | Litter 2 |           |                                   |                                      |                  |                                  |
|                                     | Litter 3 | 4         | 1402 (79)                         | 15.9 (12.8)                          | 0                |                                  |

BW, birth weight; CLS1, complex lipid supplement 1; CLS2, complex lipid supplement 2; GV, growth velocity; IQR, interquartile range

Table S3. Median plasma levels of select fatty acids in the n-3 pathway, expressed as mol% ( $\pm$  IQR)

| <b>Group</b> | <b>Day</b> | <b>ALA, 18:3,n-3</b> | <b>EPA, 20:5,n-3</b> | <b>DHA, 22:6,n-3</b> |
|--------------|------------|----------------------|----------------------|----------------------|
| Intralipid   | 0          | 0.07 $\pm$ 0.03      | 0.2 $\pm$ 0.04       | 2.4 $\pm$ 0.6        |
|              | 2          | 0.9 $\pm$ 0.1        | 0.1 $\pm$ 0.04       | 1.2 $\pm$ 0.2        |
|              | 4          | 1.0 $\pm$ 0.9        | 0.1 $\pm$ 0.03       | 1.5 $\pm$ 0.03       |
|              | 6          | 0.8 $\pm$ 0.1        | 0.1 $\pm$ 0.04       | 1.2 $\pm$ 0.5        |
|              | 8          | 0.7 $\pm$ 0.1        | 0.1 $\pm$ 0.09       | 1.3 $\pm$ 0.7        |
| CLS1         | 0          | 0.08 $\pm$ 0.04      | 0.2 $\pm$ 0.03       | 2.4 $\pm$ 0.7        |
|              | 2          | 0.3 $\pm$ 0.06*      | 0.6 $\pm$ 0.08*      | 3.7 $\pm$ 0.9*       |
|              | 4          | 0.4 $\pm$ 0.03*      | 1.0 $\pm$ 0.05*      | 4.7 $\pm$ 0.3*       |
|              | 6          | 0.5 $\pm$ 0.02       | 0.8 $\pm$ 0.2*       | 4.1 $\pm$ 0.6*       |
|              | 8          | 0.5 $\pm$ 0.06       | 0.8 $\pm$ 0.1*       | 4.0 $\pm$ 0.8*       |
| CLS2         | 0          | 0.1 $\pm$ 0.01       | 0.2 $\pm$ 0.05       | 2.3 $\pm$ 0.06       |
|              | 2          | 0.4 $\pm$ 0.04*      | 0.6 $\pm$ 0.1        | 2.9 $\pm$ 0.3*       |
|              | 8          | 0.5 $\pm$ 0.06       | 0.6 $\pm$ 0.03       | 4.1 $\pm$ 0.4*       |

Column values for each fatty acid with an asterisk are different from the Intralipid® control group at that time point,  $P < 0.05$ .

ALA,  $\alpha$ -linolenic acid; CLS1, complex lipid supplement 1; CLS2, complex lipid supplement 2; DHA, docosahexaenoic acid; EPA, eicosapentaenoic acid; IQR, interquartile range

Table S4. Median plasma levels of select fatty acids in the n-6 pathway, expressed as mol% ( $\pm$  IQR)

| <b>Group</b> | <b>Day</b> | <b>LA, 18:2,n-6</b> | <b>GLA, 18:3,n-6</b> | <b>DGLA, 20:3, n-6</b> | <b>AA, 20:4, n-6</b>         |
|--------------|------------|---------------------|----------------------|------------------------|------------------------------|
| Intralipid   | 0          | 5.1 $\pm$ 0.9       | 0.3 $\pm$ 0.2        | 0.4 $\pm$ 0.1          | 14.3 $\pm$ 1.7               |
|              | 2          | 17.4 $\pm$ 1.8      | 0.7 $\pm$ 0.4        | 0.4 $\pm$ 0.0          | 8.6 $\pm$ 0.7                |
|              | 4          | 20.2 $\pm$ 1.3      | 0.4 $\pm$ 0.3        | 0.3 $\pm$ 0.0          | 8.4 $\pm$ 0.2                |
|              | 6          | 24.1 $\pm$ 0.9      | 0.3 $\pm$ 0.1        | 0.4 $\pm$ 0.1          | 7.6 $\pm$ 1.4                |
|              | 8          | 23.8 $\pm$ 5.8      | 0.4 $\pm$ 0.2        | 0.4 $\pm$ 0.2          | 7.0 $\pm$ 1.4                |
| CLS1         | 0          | 4.9 $\pm$ 0.7       | 0.3 $\pm$ 0.2        | 0.4 $\pm$ 0.1          | 13.6 $\pm$ 2.2               |
|              | 2          | 11.9 $\pm$ 0.7*     | 1.5 $\pm$ 0.8*       | 0.5 $\pm$ 0.1*         | 9.9 $\pm$ 2.0                |
|              | 4          | 14.5 $\pm$ 1.2*     | 2.1 $\pm$ 0.4*       | 0.6 $\pm$ 0.1*         | 9.4 $\pm$ 0.6                |
|              | 6          | 17.3 $\pm$ 0.6*     | 1.6 $\pm$ 0.0*       | 0.7 $\pm$ 0.1*         | 8.4 $\pm$ 0.1                |
|              | 8          | 19.9 $\pm$ 1.1*     | 1.5 $\pm$ 0.4*       | 0.7 $\pm$ 0.1*         | 7.3 $\pm$ 1.1                |
| CLS2         | 0          | 5.7 $\pm$ 0.3       | 0.2 $\pm$ 0.1        | 0.5 $\pm$ 0.0          | 13.1 $\pm$ 0.5               |
|              | 2          | 12.5 $\pm$ 0.6      | 1.1 $\pm$ 0.3        | 0.7 $\pm$ 0.1*         | 11.2 $\pm$ 0.6               |
|              | 8          | 17.8 $\pm$ 1.0*     | 1.5 $\pm$ 0.1        | 0.6 $\pm$ 0.0          | 11.3 $\pm$ 0.6* <sup>†</sup> |

Column values for each fatty acid with an asterisk are different from the Intralipid® control

group at that time point,  $P < 0.05$ . Column values for each fatty acid in the CLS2 group with a superscript dagger are different from the CLS1 group at that time point,  $P < 0.05$ .

AA, arachidonic acid; DGLA, dihomo-gamma-linolenic acid; GLA, gamma-linolenic acid; IQR, interquartile range; LA, linoleic acid

Table S5. Median ileum tissue levels of select fatty acids in the n-3 and n-6 pathways, expressed as mol% ( $\pm$  IQR)

| Group      | n-3 Fatty Acids              |                             |                             | n-6 Fatty Acids             |                              |                             |                             |
|------------|------------------------------|-----------------------------|-----------------------------|-----------------------------|------------------------------|-----------------------------|-----------------------------|
|            | ALA, 18:3,n-3                | EPA, 20:5,n-3               | DHA, 22:6,n-3               | LA, 18:2,n-6                | GLA, 18:3,n-6                | DGLA, 20:3,n-6              | AA, 20:4,n-6                |
| Birth      | 0.08 $\pm$ 0.04 <sup>a</sup> | 0.2 $\pm$ 0.2 <sup>ab</sup> | 2.0 $\pm$ 0.7 <sup>ab</sup> | 5.6 $\pm$ 1.7 <sup>a</sup>  | 0 $\pm$ 0.0 <sup>ab</sup>    | 1.3 $\pm$ 0.1 <sup>a</sup>  | 17.7 $\pm$ 1.1 <sup>a</sup> |
| Intralipid | 0.7 $\pm$ 0.6 <sup>b</sup>   | 0.1 $\pm$ 0.03 <sup>a</sup> | 1.1 $\pm$ 0.3 <sup>a</sup>  | 14.0 $\pm$ 6.1 <sup>b</sup> | 0.07 $\pm$ 0.04 <sup>a</sup> | 0.9 $\pm$ 0.1 <sup>b</sup>  | 10.9 $\pm$ 4.6 <sup>b</sup> |
| CLS1       | 0.2 $\pm$ 0.2 <sup>c</sup>   | 0.7 $\pm$ 0.3 <sup>c</sup>  | 5.7 $\pm$ 1.2 <sup>b</sup>  | 11.0 $\pm$ 1.3 <sup>c</sup> | 1 $\pm$ 0.7 <sup>c</sup>     | 1.7 $\pm$ 0.06 <sup>c</sup> | 12.0 $\pm$ 2.7 <sup>b</sup> |
| CLS2       | 0.1 $\pm$ 0.01 <sup>a</sup>  | 0.3 $\pm$ 0.05 <sup>b</sup> | 5.8 $\pm$ 0.9 <sup>b</sup>  | 7.8 $\pm$ 0.9 <sup>a</sup>  | 0.6 $\pm$ 0.3 <sup>bc</sup>  | 1.2 $\pm$ 0.2 <sup>a</sup>  | 17.2 $\pm$ 0.6 <sup>a</sup> |

Medians in a column for each group without a common letter differ,  $P < 0.05$ .

AA, arachidonic acid; ALA,  $\alpha$ -linolenic acid; CLS1, complex lipid supplement 1; CLS2, complex lipid supplement 2; DGLA, dihomo-gamma-linolenic acid; DHA, docosahexaenoic acid; EPA, eicosapentaenoic acid; GLA, gamma-linolenic acid; IQR, interquartile range; LA, linoleic acid

Table S6. Median brain tissue levels of select fatty acids in the n-3 and n-6 pathways, expressed as mol% ( $\pm$  IQR)

| Group      | n-3 Fatty Acids |                               |                            | n-6 Fatty Acids             |                 |                |                |
|------------|-----------------|-------------------------------|----------------------------|-----------------------------|-----------------|----------------|----------------|
|            | ALA, 18:3,n-3   | EPA, 20:5,n-3                 | DHA, 22:6,n-3              | LA, 18:2,n-6                | GLA, 18:3,n-6   | DGLA, 20:3,n-6 | AA, 20:4,n-6   |
| Birth      | 0 $\pm$ 0       | 0.1 $\pm$ 0.03 <sup>a</sup>   | 7.2 $\pm$ 0.8 <sup>a</sup> | 0.3 $\pm$ 0.04 <sup>a</sup> | 0.02 $\pm$ 0.01 | 0.3 $\pm$ 0.08 | 11.6 $\pm$ 0.2 |
| Intralipid | 0.02 $\pm$ 0.01 | 0.06 $\pm$ 0.05 <sup>b</sup>  | 8.1 $\pm$ 0.5 <sup>a</sup> | 0.9 $\pm$ 0.3 <sup>b</sup>  | 0.03 $\pm$ 0.01 | 0.5 $\pm$ 0.3  | 12.0 $\pm$ 0.3 |
| CLS1       | 0.02 $\pm$ 0    | 0.05 $\pm$ 0.01 <sup>b</sup>  | 9.7 $\pm$ 0.5 <sup>b</sup> | 0.7 $\pm$ 0.08 <sup>c</sup> | 0.03 $\pm$ 0.01 | 0.5 $\pm$ 0.05 | 11.9 $\pm$ 0.3 |
| CLS2       | 0.02 $\pm$ 0    | 0.06 $\pm$ 0.01 <sup>ab</sup> | 9.7 $\pm$ 0.2 <sup>b</sup> | 0.6 $\pm$ 0.1 <sup>ac</sup> | 0.03 $\pm$ 0.01 | 0.4 $\pm$ 0.03 | 12.0 $\pm$ 0.0 |

Medians in a column for each group without a common letter differ,  $P < 0.05$ .

AA, arachidonic acid; ALA,  $\alpha$ -linolenic acid; CLS1, complex lipid supplement 1; CLS2, complex lipid supplement 2; DGLA, dihomo-gamma-linolenic acid; DHA, docosahexaenoic acid; EPA, eicosapentaenoic acid; GLA, gamma-linolenic acid; IQR, interquartile range; LA, linoleic acid

Table S7. Lutein, Tocopherol, Vitamin D Body Compartment Levels

| Compartment      | Group                 | n  | Lutein, ng/g             | Tocopherol, ug/g          | 25 Hydroxyvitamin D3, ng/g | Vitamin D, ng/g           |
|------------------|-----------------------|----|--------------------------|---------------------------|----------------------------|---------------------------|
| Plasma           | Baseline <sup>1</sup> | 5  | BDL <sup>ab</sup>        | 0.2 ± 0.0 <sup>a</sup>    | BDL <sup>a</sup>           | 0.5 ± 0.3 <sup>a</sup>    |
|                  | Intralipid            | 8  | BDL <sup>a</sup>         | 2.7 ± 2.4 <sup>ab</sup>   | 2.6 ± 3.4 <sup>ab</sup>    | 16.2 ± 12.6 <sup>b</sup>  |
|                  | CLS1                  | 11 | BDL <sup>ab</sup>        | 7.5 ± 4.1 <sup>bc</sup>   | 6.9 ± 6.9 <sup>bc</sup>    | 21.2 ± 10.3 <sup>bc</sup> |
|                  | CLS2                  | 4  | 5.0 ± 1.0 <sup>b</sup>   | 8.9 ± 1.3 <sup>c</sup>    | 8.9 ± 1.3 <sup>c</sup>     | 33.6 ± 3.4 <sup>c</sup>   |
| Liver            | Baseline              | 5  | BDL <sup>ab</sup>        | 0.3 ± 0.0 <sup>a</sup>    | BDL <sup>a</sup>           | 0.5 ± 0.3                 |
|                  | Intralipid            | 8  | 2.8 ± 2.9 <sup>a</sup>   | 40.9 ± 36.6 <sup>b</sup>  | 34.7 ± 38.2 <sup>b</sup>   | 15.8 ± 23.1               |
|                  | CLS1                  | 11 | 35.5 ± 36.7 <sup>b</sup> | 85.3 ± 24.1 <sup>bc</sup> | 83.6 ± 35.5 <sup>bc</sup>  | 38.6 ± 25.3               |
|                  | CLS2                  | 4  | 60.3 ± 22.9 <sup>b</sup> | 101.7 ± 44.5 <sup>c</sup> | 101.7 ± 44.5 <sup>c</sup>  | 54.7 ± 32.3               |
| Eye              | Baseline              | 5  | BDL <sup>a</sup>         | BDL                       | BDL                        | BDL                       |
|                  | Intralipid            | 8  | BDL <sup>a</sup>         | BDL                       | BDL                        | BDL                       |
|                  | CLS1                  | 11 | 0.7 ± 0.7 <sup>b</sup>   | BDL                       | BDL                        | BDL                       |
|                  | CLS2                  | 4  | 0.6 ± 0.1 <sup>b</sup>   | BDL                       | BDL                        | BDL                       |
| Frontal cortex   | Baseline              | 5  | BDL                      | 0.4 ± 0.1 <sup>a</sup>    | BDL <sup>a</sup>           | BDL                       |
|                  | Intralipid            | 8  | BDL                      | 2.0 ± 0.9 <sup>a</sup>    | 1.7 ± 1.5 <sup>a</sup>     | BDL                       |
|                  | CLS1                  | 11 | BDL                      | 3.9 ± 0.7 <sup>b</sup>    | 3.9 ± 1.4 <sup>b</sup>     | BDL                       |
|                  | CLS2                  | 4  | BDL                      | 5.3 ± 0.8 <sup>c</sup>    | 5.3 ± 0.8 <sup>c</sup>     | BDL                       |
| Occipital cortex | Baseline              | 5  | BDL                      | 0.3 ± 0.1 <sup>a</sup>    | BDL <sup>a</sup>           | BDL                       |
|                  | Intralipid            | 8  | BDL                      | 2.6 ± 1.4 <sup>ab</sup>   | 2.0 ± 1.7 <sup>ab</sup>    | BDL                       |
|                  | CLS1                  | 11 | BDL                      | 3.3 ± 1.7 <sup>b</sup>    | 3.2 ± 1.7 <sup>b</sup>     | BDL                       |
|                  | CLS2                  | 4  | BDL                      | 4.6 ± 0.9 <sup>ab</sup>   | 1.9 ± 3.8 <sup>ab</sup>    | BDL                       |
| Cerebellum       | Baseline              | 5  | BDL                      | 0.4 ± 0.1 <sup>ab</sup>   | BDL <sup>ab</sup>          | BDL                       |
|                  | Intralipid            | 8  | BDL                      | 4.1 ± 0.3 <sup>a</sup>    | 3.6 ± 3.8 <sup>a</sup>     | BDL                       |
|                  | CLS1                  | 11 | BDL                      | 5.1 ± 2.5 <sup>ab</sup>   | 4.9 ± 3.6 <sup>ab</sup>    | BDL                       |
|                  | CLS2                  | 4  | BDL                      | 6.5 0± 0.7 <sup>b</sup>   | 6.5 0± 0.7 <sup>a</sup>    | BDL                       |

<sup>1</sup>Baseline = birth samples

BDL, below detection limit

Labeled points without a common letter represents a statistically significant difference,  $P < 0.05$ .

Table S8. Sources of Fatty Acids and Lipophilic Nutrients

| Nutrient             | Source                                        |
|----------------------|-----------------------------------------------|
| Docosahexaenoic acid | Structured lipid; Nippon Kaisha, Ltd.         |
| Gamma-linolenic acid | Borage oil; Bioriginal Food and Science Corp. |
| Arachidonic acid     | Mortierella alpine oil; DSM Nutritionals      |
| Mixed tocopherols    | BASF Corp.                                    |
| Vitamin D3           | DSM Nutritionals                              |
| Lutein               | DSM Nutritionals                              |
| Vitamin E            | Prinova Solutions                             |



Figure S1. Western blot (A) and quantification (B) of pancreatic lipase in immature, preterm piglets (n=6) versus mature pigs (n=2).

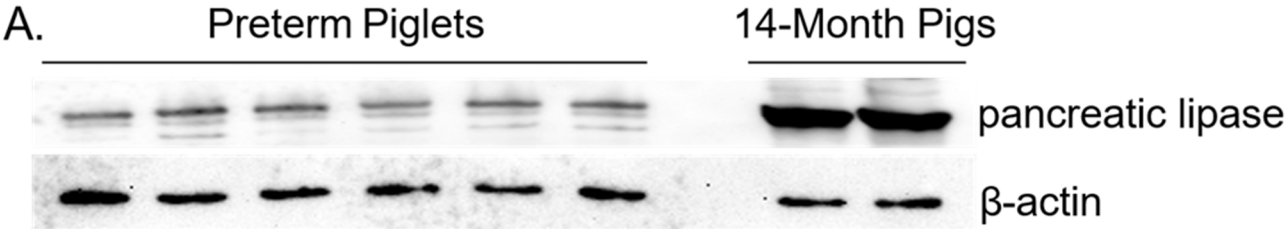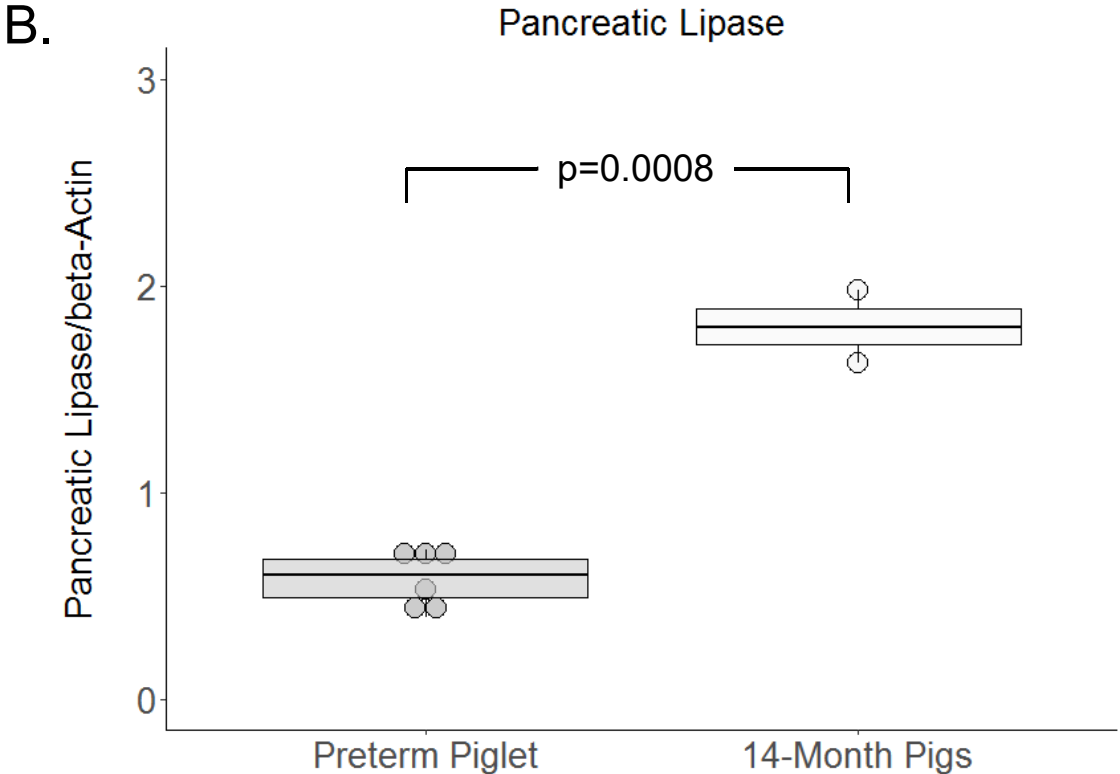

Figure S2. Quantification of TUNEL staining in the distal ileum tissue represented as dot plots. Staining intensity score of 0 for none, 1 for weak, 2 for moderate, and 3 for strong. All samples scored a 0 or 1. Open circles represent a single sample. Black circles represent the median value for each group. CLS, concentrated lipid supplement; IL, Intralipid®-control.

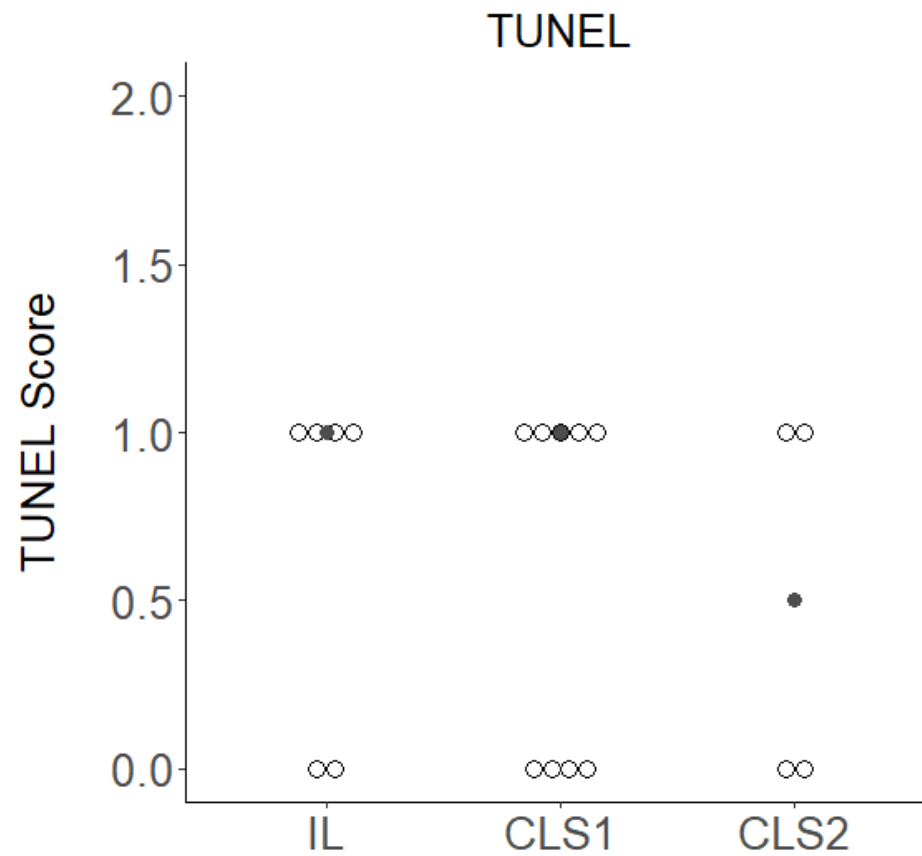

Supplement: NIHMS1045888-supplement-Supp_info.pdf [file NIHMS1045888-supplement-Supp_info.pdf]
